# Supplementary material
Source: HighWire-hosted journal article supplement (https://jitc.bmj.com/content/9/7/e002926)
Supplement: inline-supplementary-material-1 [file inline-supplementary-material-1.pdf]

## Supplementary Materials for

### First-in-Human DR5 PET Reveals Insufficient DR5 Expression in GI Cancer

#### Patients

Shujing Wang<sup>1, #</sup>, Hua Zhu<sup>1, #</sup>, Yingjie Li<sup>2, #</sup>, Jin Ding<sup>1</sup>, Feng Wang<sup>1</sup>, Lixin Ding<sup>1</sup>,  
Xinyu Wang<sup>2</sup>, Jun Zhao<sup>2</sup>, Yan Zhang<sup>1</sup>, Yunfeng Yao<sup>2</sup>, Tong Zhou<sup>3</sup>, Nan Li<sup>1, \*</sup>, Aiwen  
Wu<sup>2, \*</sup>, Zhi Yang<sup>1, \*</sup>

<sup>1</sup>Key Laboratory of Carcinogenesis and Translational Research (Ministry of Education/Beijing), NMPA Key Laboratory for Research and Evaluation of Radiopharmaceuticals (National Medical Products Administration), Department of Nuclear Medicine, Peking University Cancer Hospital & Institute, Beijing 100142, China;

<sup>2</sup>Key Laboratory of Carcinogenesis and Translational Research (Ministry of Education/Beijing), Department of Gastrointestinal Surgery, Peking University Cancer Hospital & Institute, Beijing 100142, China;

<sup>3</sup>Department of Cell Biology and Divisions of Clinical Immunology and Rheumatology, University of Alabama at Birmingham, Birmingham, Alabama.

#### \* Correspondence to:

Dr Nan Li; rainbow6283@sina.com

Dr Aiwen Wu; wuaw@sina.com

Dr Zhi Yang; pekyz@163.com

#### This PDF file includes:

Figure S1 to S3

Figure S2 to S4

Figure S3 to S5  
Figure S4 to S6  
Figure S5 to S7  
Figure S6 to S8-9  
Table S1 to S10  
Table S2 to S11  
Table S3 to S12

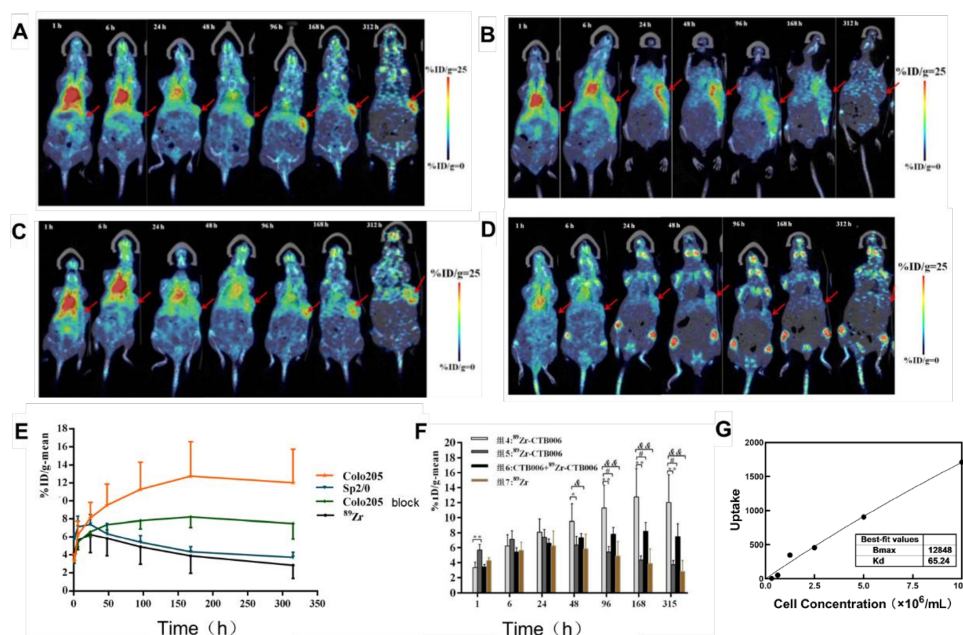

**Figure S1.** The Colo205 tumor in the experiment group showed obvious uptake of  $^{89}\text{Zr}$ -CTB006 and obtained the highest uptake at 168h after administration (%ID/g:  $12.75 \pm 3.81$ ). The experiment group showed significant higher uptake in tumors than that in the blocking group (%ID/g:  $12.75 \pm 3.81$  vs  $8.21 \pm 1.16$ ,  $P < 0.05$ ), the control group (%ID/g:  $12.75 \pm 3.81$  vs  $4.34 \pm 0.55$ ,  $P < 0.01$ ) and the free  $^{89}\text{Zr}$  group (%ID/g:  $12.75 \pm 3.81$  vs  $3.88 \pm 1.93$ ,  $P < 0.01$ ). **A.** The PET/CT images of the Colo205 mouse in the experiment group. **B.** The PET/CT images of the Sp2/0 mouse in the control group. **C.** The PET/CT images of the Colo205 mouse in the blocking group. **D.** The PET/CT images of the Colo205 mouse in the free  $^{89}\text{Zr}$  group. **E-F.** The tumor %ID/g in the four groups. **G.** The affinity of  $^{89}\text{Zr}$ -CTB006 in Colo205 cells.

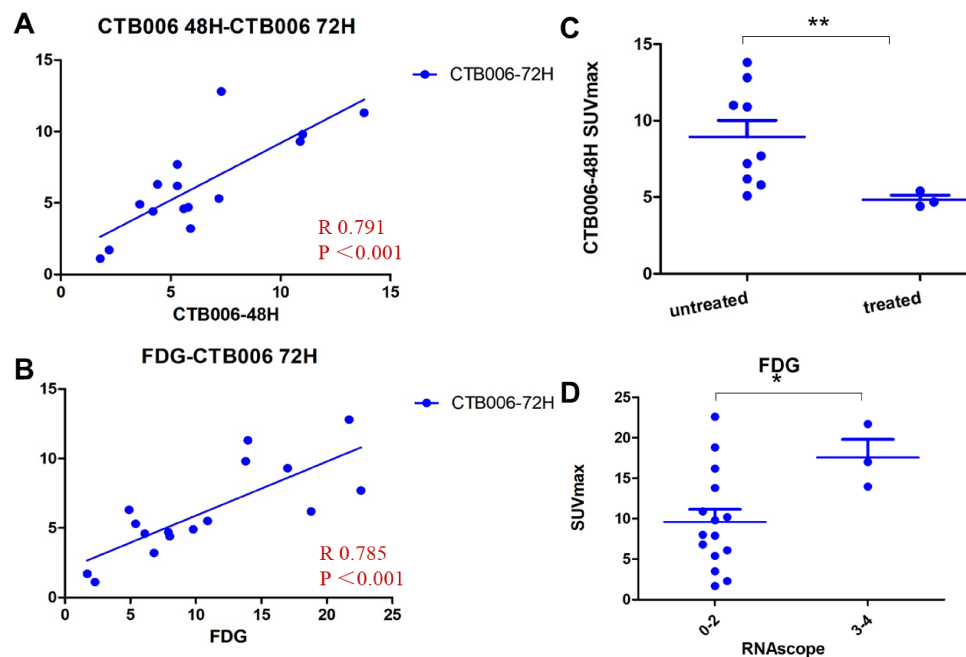

**Figure S2. A.** There was a significant positive correlation between the  $SUV_{max}$  of tumors on  $^{89}\text{Zr}$ -CTB006 PET/CT at 48h and that at 72h ( $P < 0.001$ ). **B.** There was a significant positive correlation between the  $SUV_{max}$  of tumors on  $^{89}\text{Zr}$ -CTB006 PET/CT at 72h and that on  $^{18}\text{F}$ -FDG PET/CT ( $P < 0.001$ ). **C.**  $SUV_{max}$  in colorectal cancer that had received radiotherapy or chemotherapy was significantly lower than that without treatment on 48h  $^{89}\text{Zr}$ -CTB006 PET/CT ( $4.83 \pm 0.51$  vs  $8.94 \pm 3.28$ ,  $P = 0.005$ ). **D.** The tumor uptake of  $^{18}\text{F}$ -FDG was also significantly higher in patients with RNAscope score 3-4 than that with score 0-2 ( $SUV_{max}$ :  $17.55 \pm 3.90$  vs  $9.60 \pm 6.05$ ,  $P = 0.046$ ).

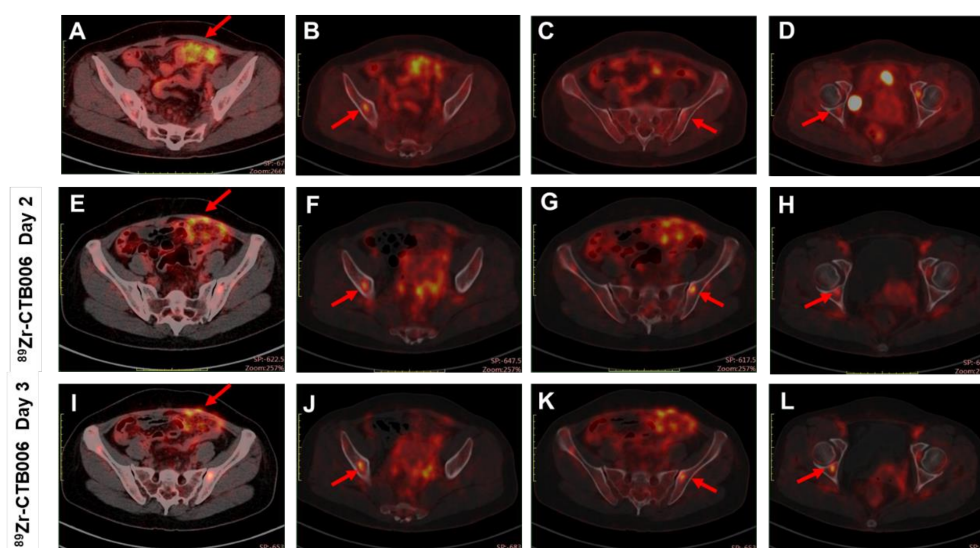

**Figure S3.**  $^{18}\text{F}$ -FDG PET/CT showed high uptake of the thickened peritoneum (**A**, arrow, SUVmax: 4.9) and the metastasis on the right iliac bone (**B**, arrow, SUVmax: 3.9), slight uptake of the metastasis on the left iliac bone (**C**, arrow, SUVmax: 2.1) and the right acetabulum (**D**, arrow, SUVmax: 2.1).  $^{89}\text{Zr}$ -CTB006 PET/CT showed inhomogeneous high uptake of the thicked peritoneum (**E**, arrow, SUVmax: 6.3 at 48h; **I**, arrow, SUVmax: 4.4 at 72h) and the metastases on the right iliac bone (**F**, arrow, SUVmax: 4.3 at 48h; **J**, arrow, SUVmax: 4.4 at 72h), the left iliac bone (**G**, arrow, SUVmax: 5.3 at 48h; **K**, arrow, SUVmax: 3.7 at 72h), the right acetabulum (**H**, arrow, SUVmax: 3.7 at 48h; **L**, arrow, SUVmax: 4.4 at 72h).

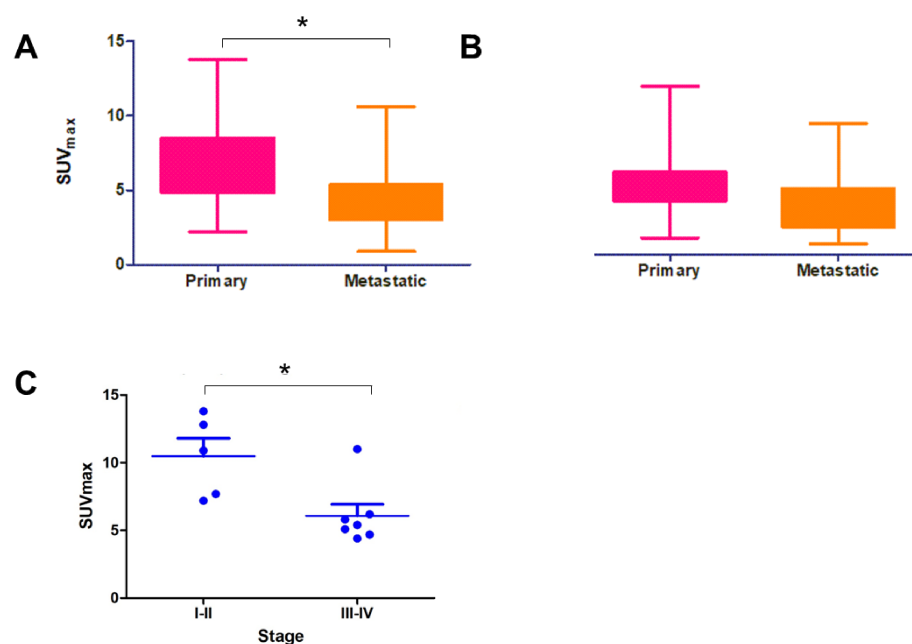

**Figure S4.** **A.** The uptake of  $^{89}\text{Zr}$ -CTB006 at 48h in the metastatic lesions was significantly lower than that in the primary lesions ( $6.97 \pm 3.14$  vs  $4.22 \pm 2.45$ ,  $P = 0.0135$ ). **B.** The uptake of  $^{89}\text{Zr}$ -CTB006 at 72h in the metastatic lesions was not significantly different from that in the primary lesions ( $5.18 \pm 2.63$  vs  $3.52 \pm 2.19$ ,  $P = 0.0704$ ). **C.** The uptake in colorectal cancer patients with III-IV stage was significantly lower than I-II stage ( $6.09 \pm 2.25$  vs  $10.48 \pm 2.96$ ,  $P = 0.015$ ).

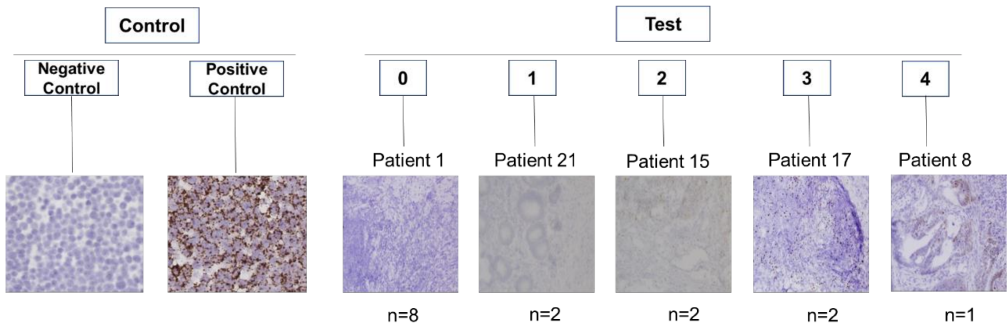

**Figure S5.** The negative and positive control images and the images of the representative sample with different RNAscope scores.

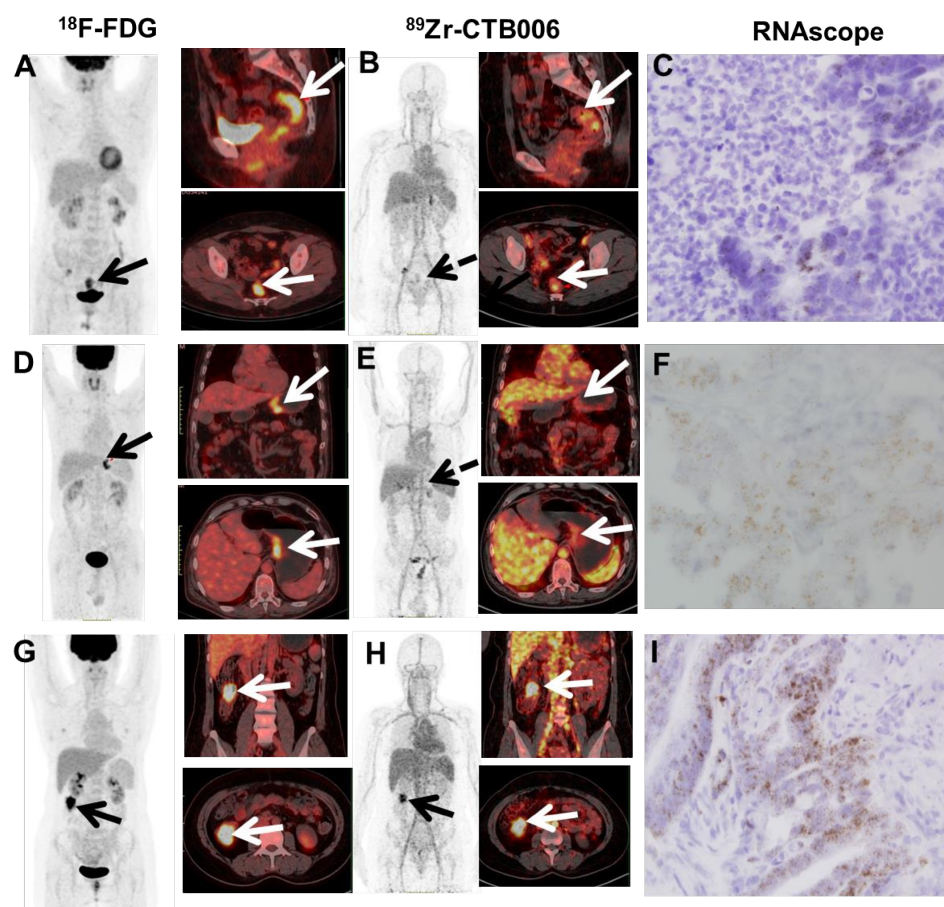

**Figure S6.** PET/CT images and RNAscope staining of patient 11, 15 and 8. **A.** MIP image, the axial and coronal PET-CT fused images of  $^{18}\text{F}$ -FDG PET/CT of patient 11 showed high uptake of  $^{18}\text{F}$ -FDG in tumor (arrow). **B.** MIP image, the axial and coronal PET-CT fused images of  $^{89}\text{Zr}$ -CTB006 PET/CT of patient 11 showed low uptake of  $^{89}\text{Zr}$ -CTB006 in tumor (arrow). **C.** RNAscope score of patient 11 was 1 (40X). **D.** MIP image, the axial and coronal PET-CT fused images of  $^{18}\text{F}$ -FDG PET/CT of patient 15 showed high uptake of  $^{18}\text{F}$ -FDG in tumor (arrow). **E.** MIP image, the axial and coronal PET-CT fused images of  $^{89}\text{Zr}$ -CTB006 PET/CT of patient 15 showed low uptake of  $^{89}\text{Zr}$ -CTB006 in tumor (arrow; the dash arrow indicates the unclearly tumor lesion). **F.** RNAscope score of patient 15 was 2 (40X).

**G.** MIP image, the axial and coronal PET-CT fused images of  $^{18}\text{F}$ -FDG PET/CT of patient 8 showed high uptake of  $^{18}\text{F}$ -FDG in tumor (arrow). **H.** MIP image, the axial and coronal PET-CT fused images of  $^{89}\text{Zr}$ -CTB006 PET/CT of patient 8 showed low uptake of  $^{89}\text{Zr}$ -CTB006 in tumor (arrow; the dash arrow indicates the unclearly tumor lesion). **I.** RNAscope score of patient 8 was 2 (40X).

**Table S1.** RNAscope Score

| RNAscope<br>score | Objective scoring by microscope                                               |
|-------------------|-------------------------------------------------------------------------------|
| 0                 | 0 or less than 1 signal per 10 cells                                          |
| 1                 | 1-3 signals per cell                                                          |
| 2                 | 4-10 signals per cell, very few cluster points                                |
| 3                 | more than 10 signals per cell, positive cells with clusters are less than 10% |
| 4                 | more than 10 signals per cell, positive cells with clusters are more than 10% |

**Table S2.** Quality Control of  $^{89}\text{Zr}$ -CTB006 for Clinical Application

| Parameter              | QC specification | QC result |
|------------------------|------------------|-----------|
| Appearance             | Clear, colorless | Pass      |
| Volume                 | 1.5-2.5ml        | 2.5ml     |
| Injection dose         | 18.5-74MBq       | 37MBq     |
| pH                     | 6.5-8.0          | 7.0       |
| Radio-thin-layer       | >95%             | >99%      |
| Chromatography         |                  |           |
| Radio-high-performance | >95%             | >99%      |
| Liquid chromatography  |                  |           |
| Ethanol                | <5%              | 0         |
| Endotoxins             | <15EU/ml         | Pass      |
| Sterility              | Sterile          | Pass      |

**Table S3.**  $^{89}\text{Zr}$ -CTB006 Gender Averaged Organ Doses [mSv/MBq]

| Target Organ         | Effective Dose |
|----------------------|----------------|
| Adrenals             | 8.77E-03       |
| Brain                | 5.34E-04       |
| Left colon           | 2.18E-02       |
| Small Intestine      | 1.21E-03       |
| Stomach Wall         | 7.63E-02       |
| Heart Wall           | 8.66E-03       |
| Kidneys              | 8.21E-03       |
| Liver                | 5.68E-02       |
| Lungs                | 6.61E-02       |
| Ovaries              | 2.69E-03       |
| Pancreas             | 5.60E-03       |
| Prostate             | 2.72E-03       |
| Salivary Glands      | 2.89E-04       |
| Red Marrow           | 1.86E-02       |
| Osteogenic Cells     | 8.86E-04       |
| Spleen               | 1.08E-02       |
| Urinary Bladder Wall | 1.86E-03       |
| Uterus               | 1.63E-03       |
| Total Body           | 0.00E+00       |
| Effective Dose       | 3.49E-01       |
